# Supplementary material
Source: publisher site journal article supplement (https://www.dovepress.com/article/533281)
Supplement: Supplementary file 1 [file 533281%20Revised%20Supplementary%20Figures%20S1-S4.docx]

**Supplementary Figures**


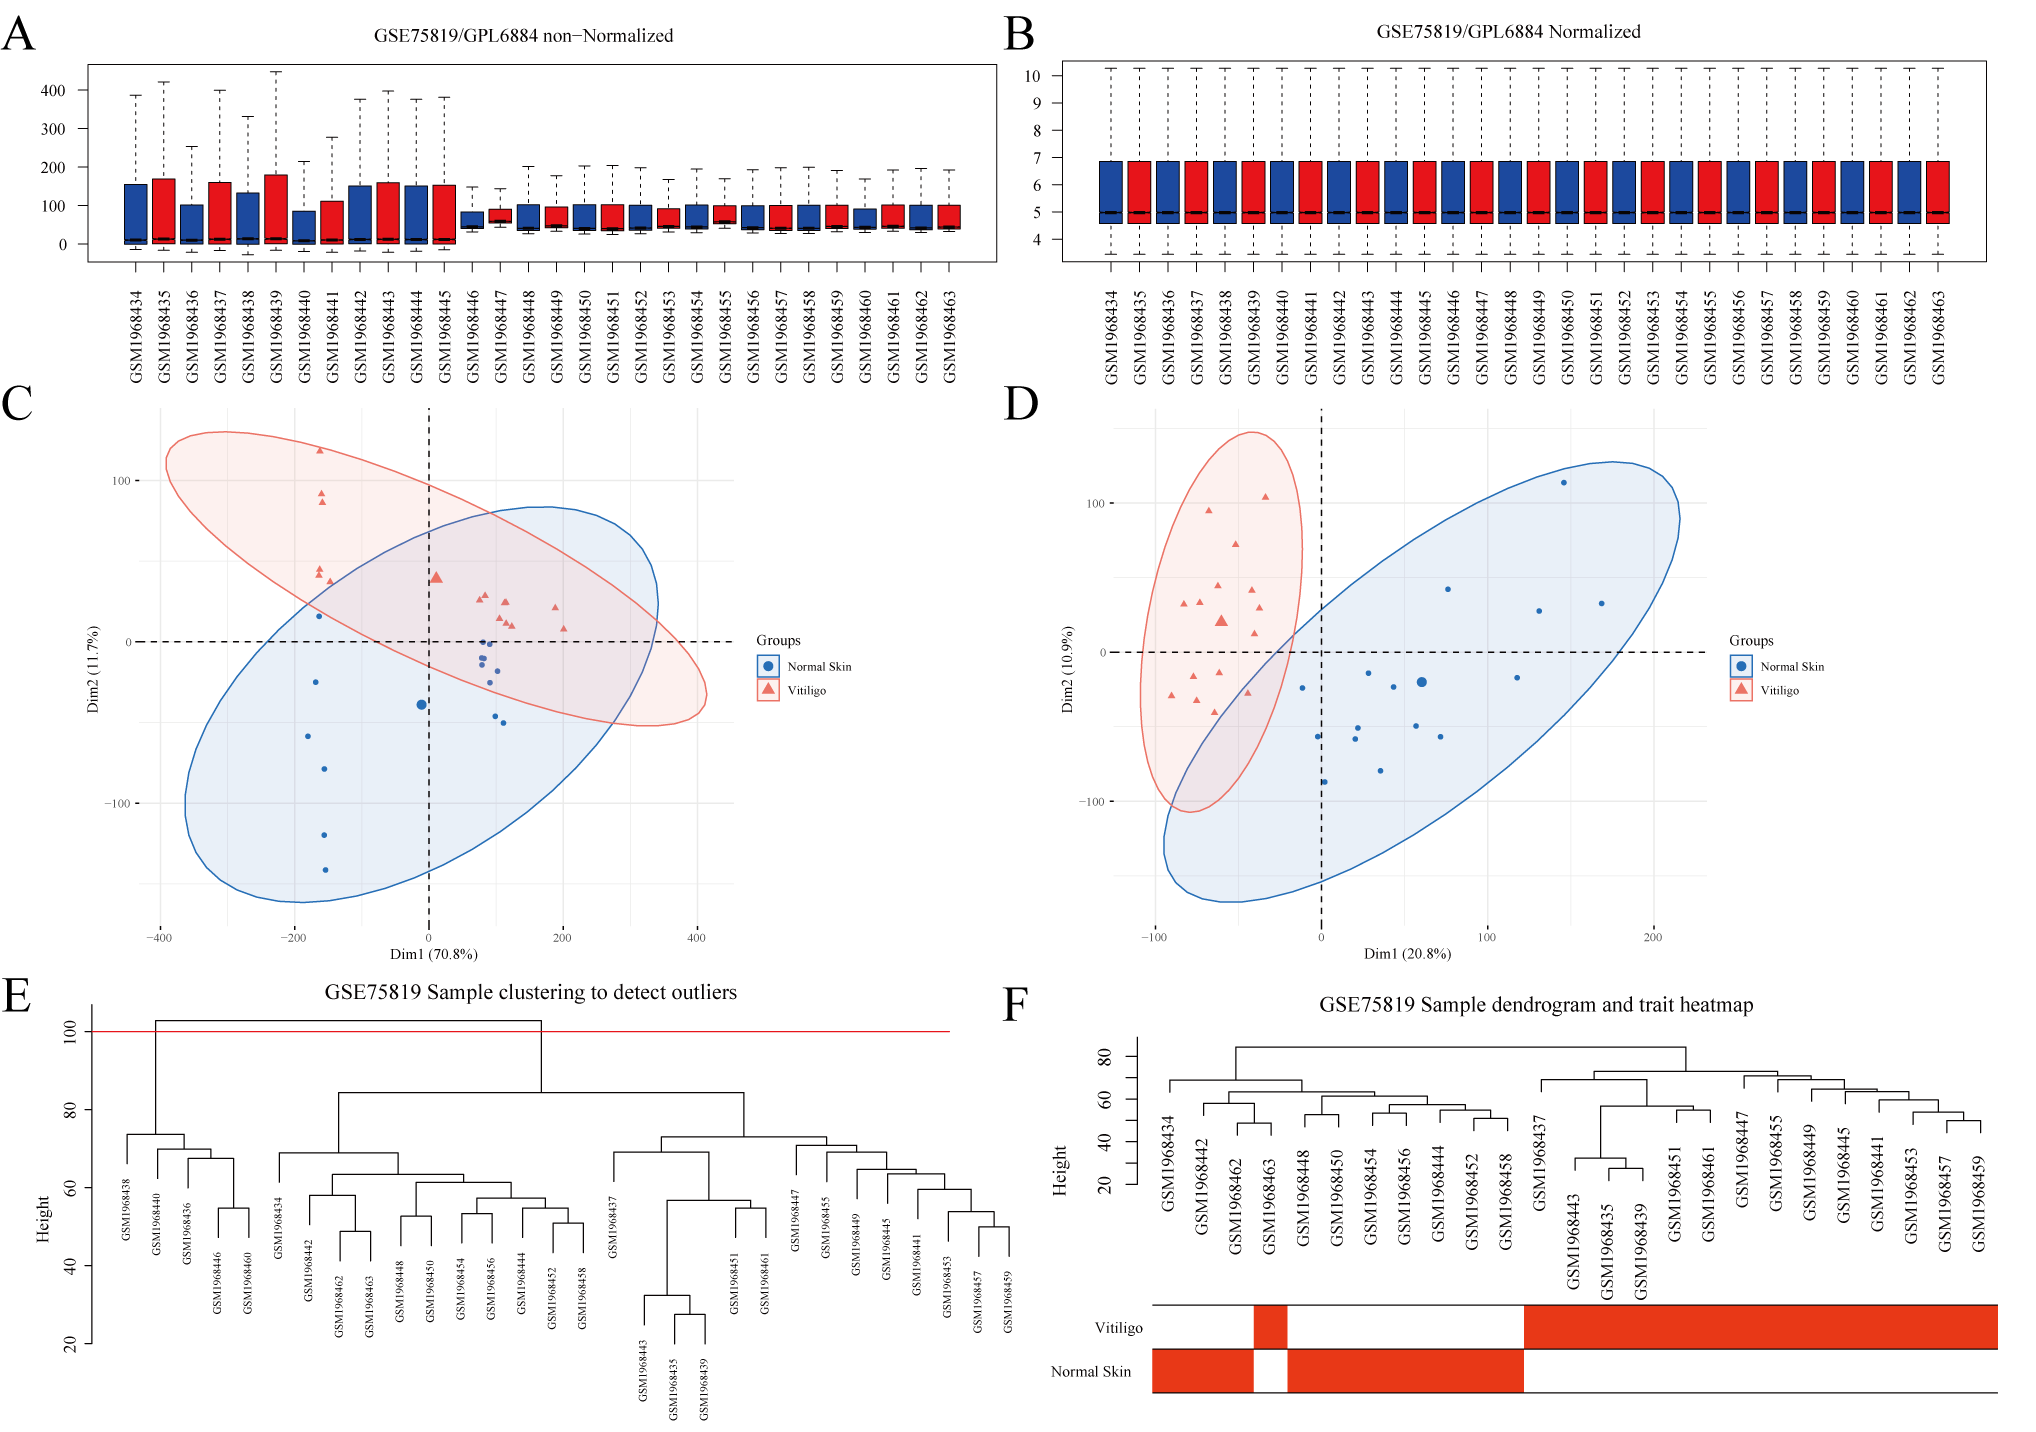


**Supplementary Figure S1** GSE75819 dataset data processing. (A, B) Boxplots before (left) and after (right) normalization. (C, D) PCA plots before (left) and after (right) normalization. (E) Dendrogram of the sample clustering. (F) Dendrogram of the sample clustering after removing outliers and the relationship with phenotypes.


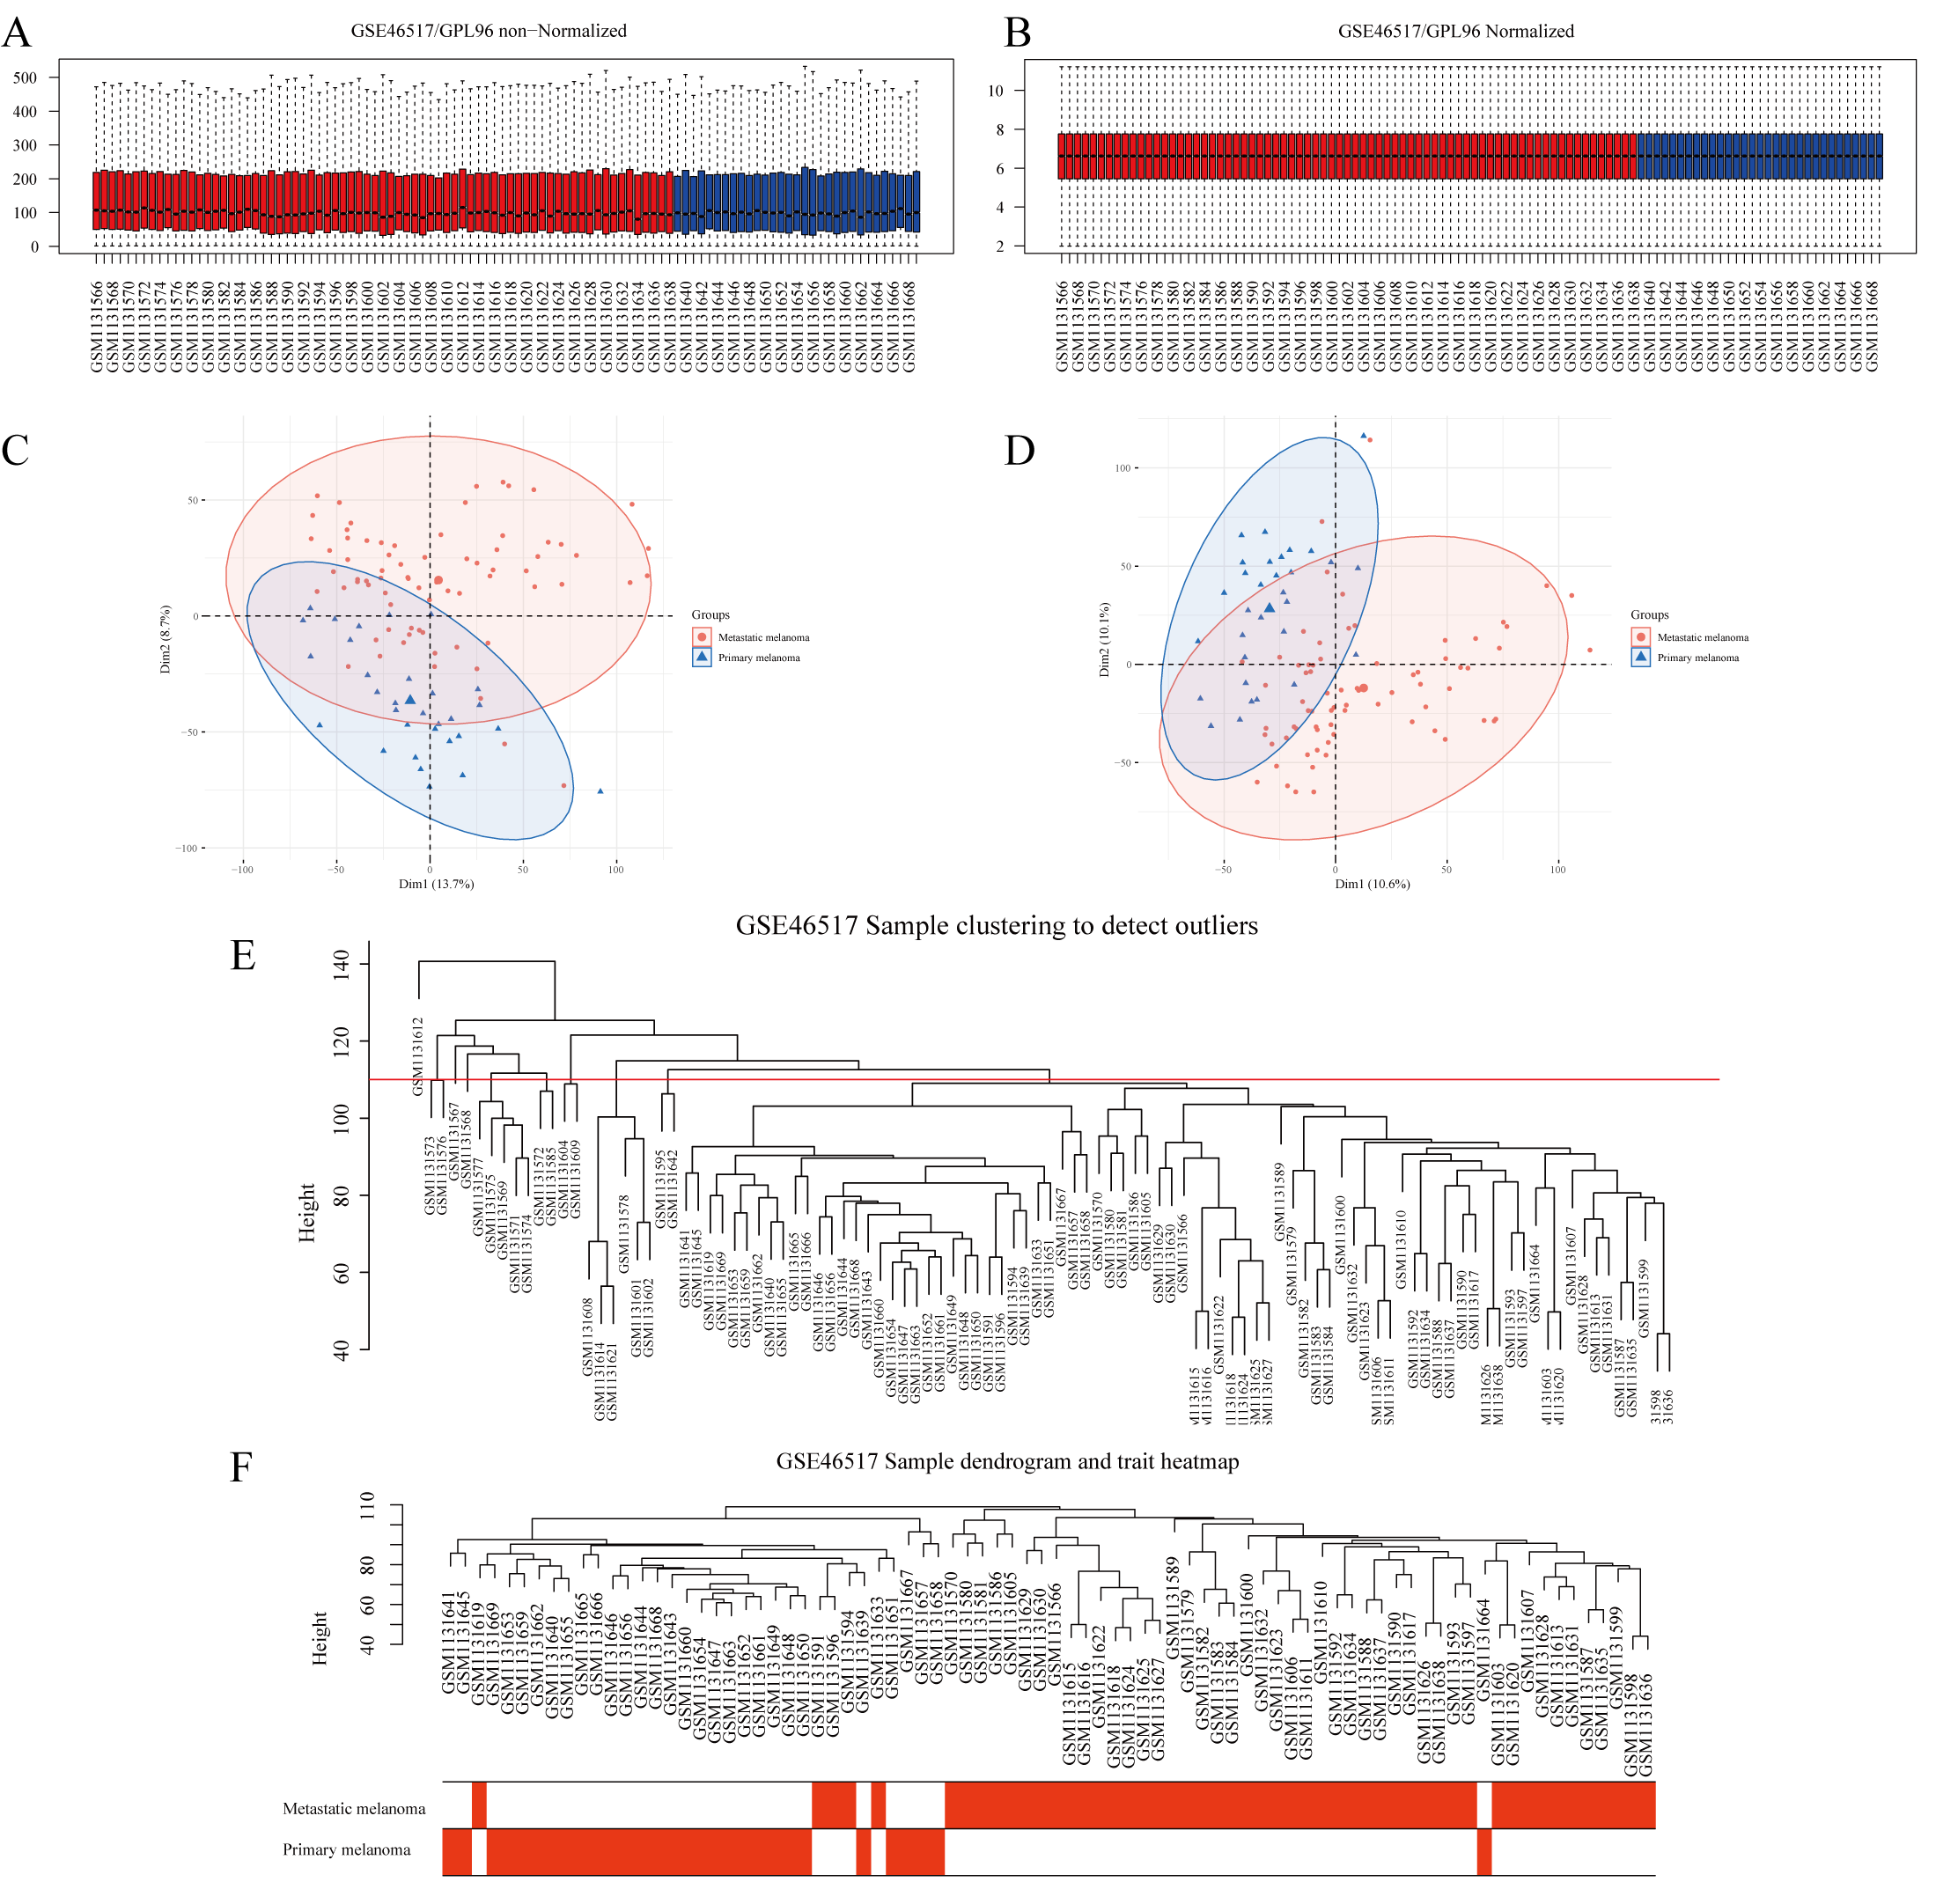


**Supplementary Figure S2** GSE46517 dataset data processing. (A, B) Boxplots before (left) and after (right) normalization. (C, D) PCA plots before (left) and after (right) normalization, respectively. (E) Dendrogram of the sample clustering. (F) Dendrogram of the sample clustering after removing outliers and the relationship with phenotypes.


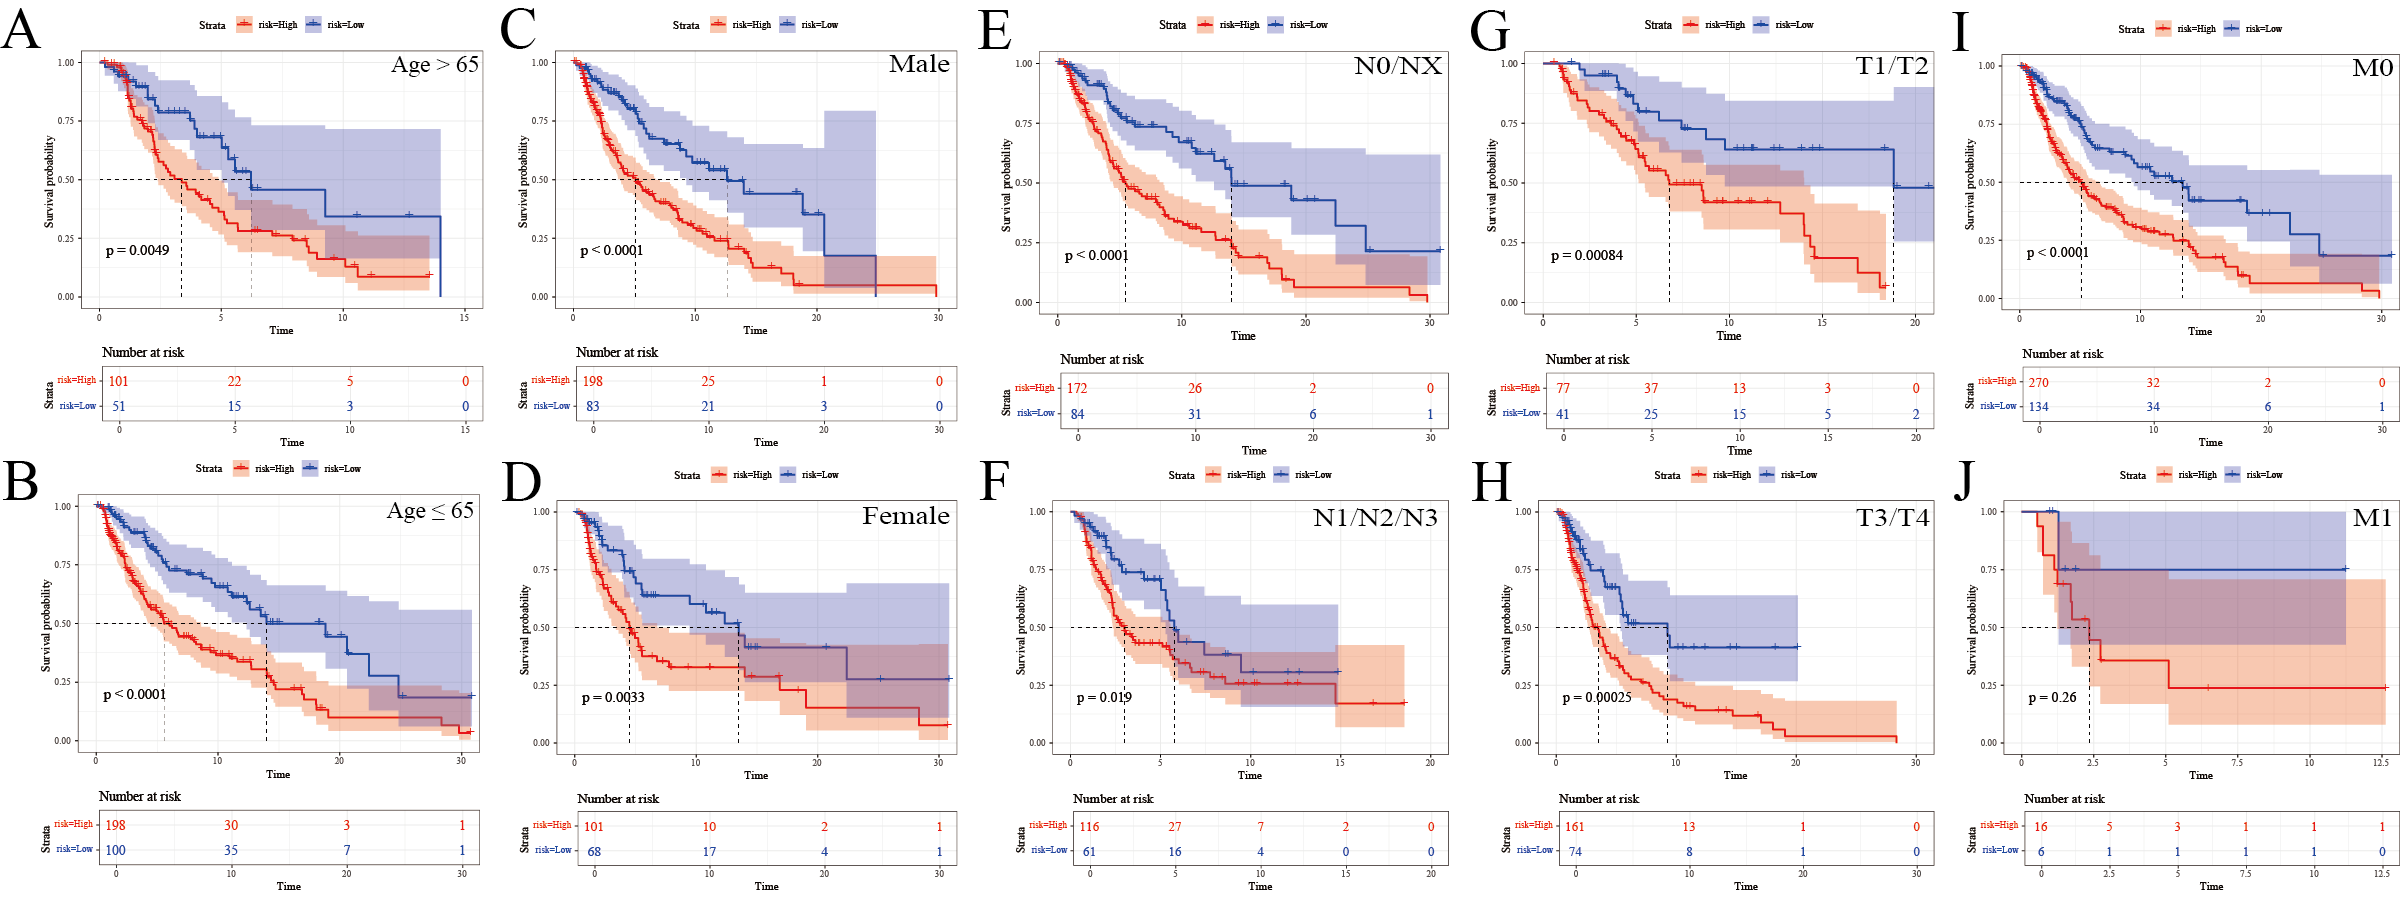


**Supplementary Figure S3** Subgroup analysis of clinical characteristics based on the Kaplan-Meier method. (A-J) Kaplan-Meier method for Age > 65, Age ≤ 65, Male, Female, N0/NX, N1/N2/N3, T1/T2, T3/T4, M0 and M1 subgroups of TCGA-SKCM cohort, respectively.


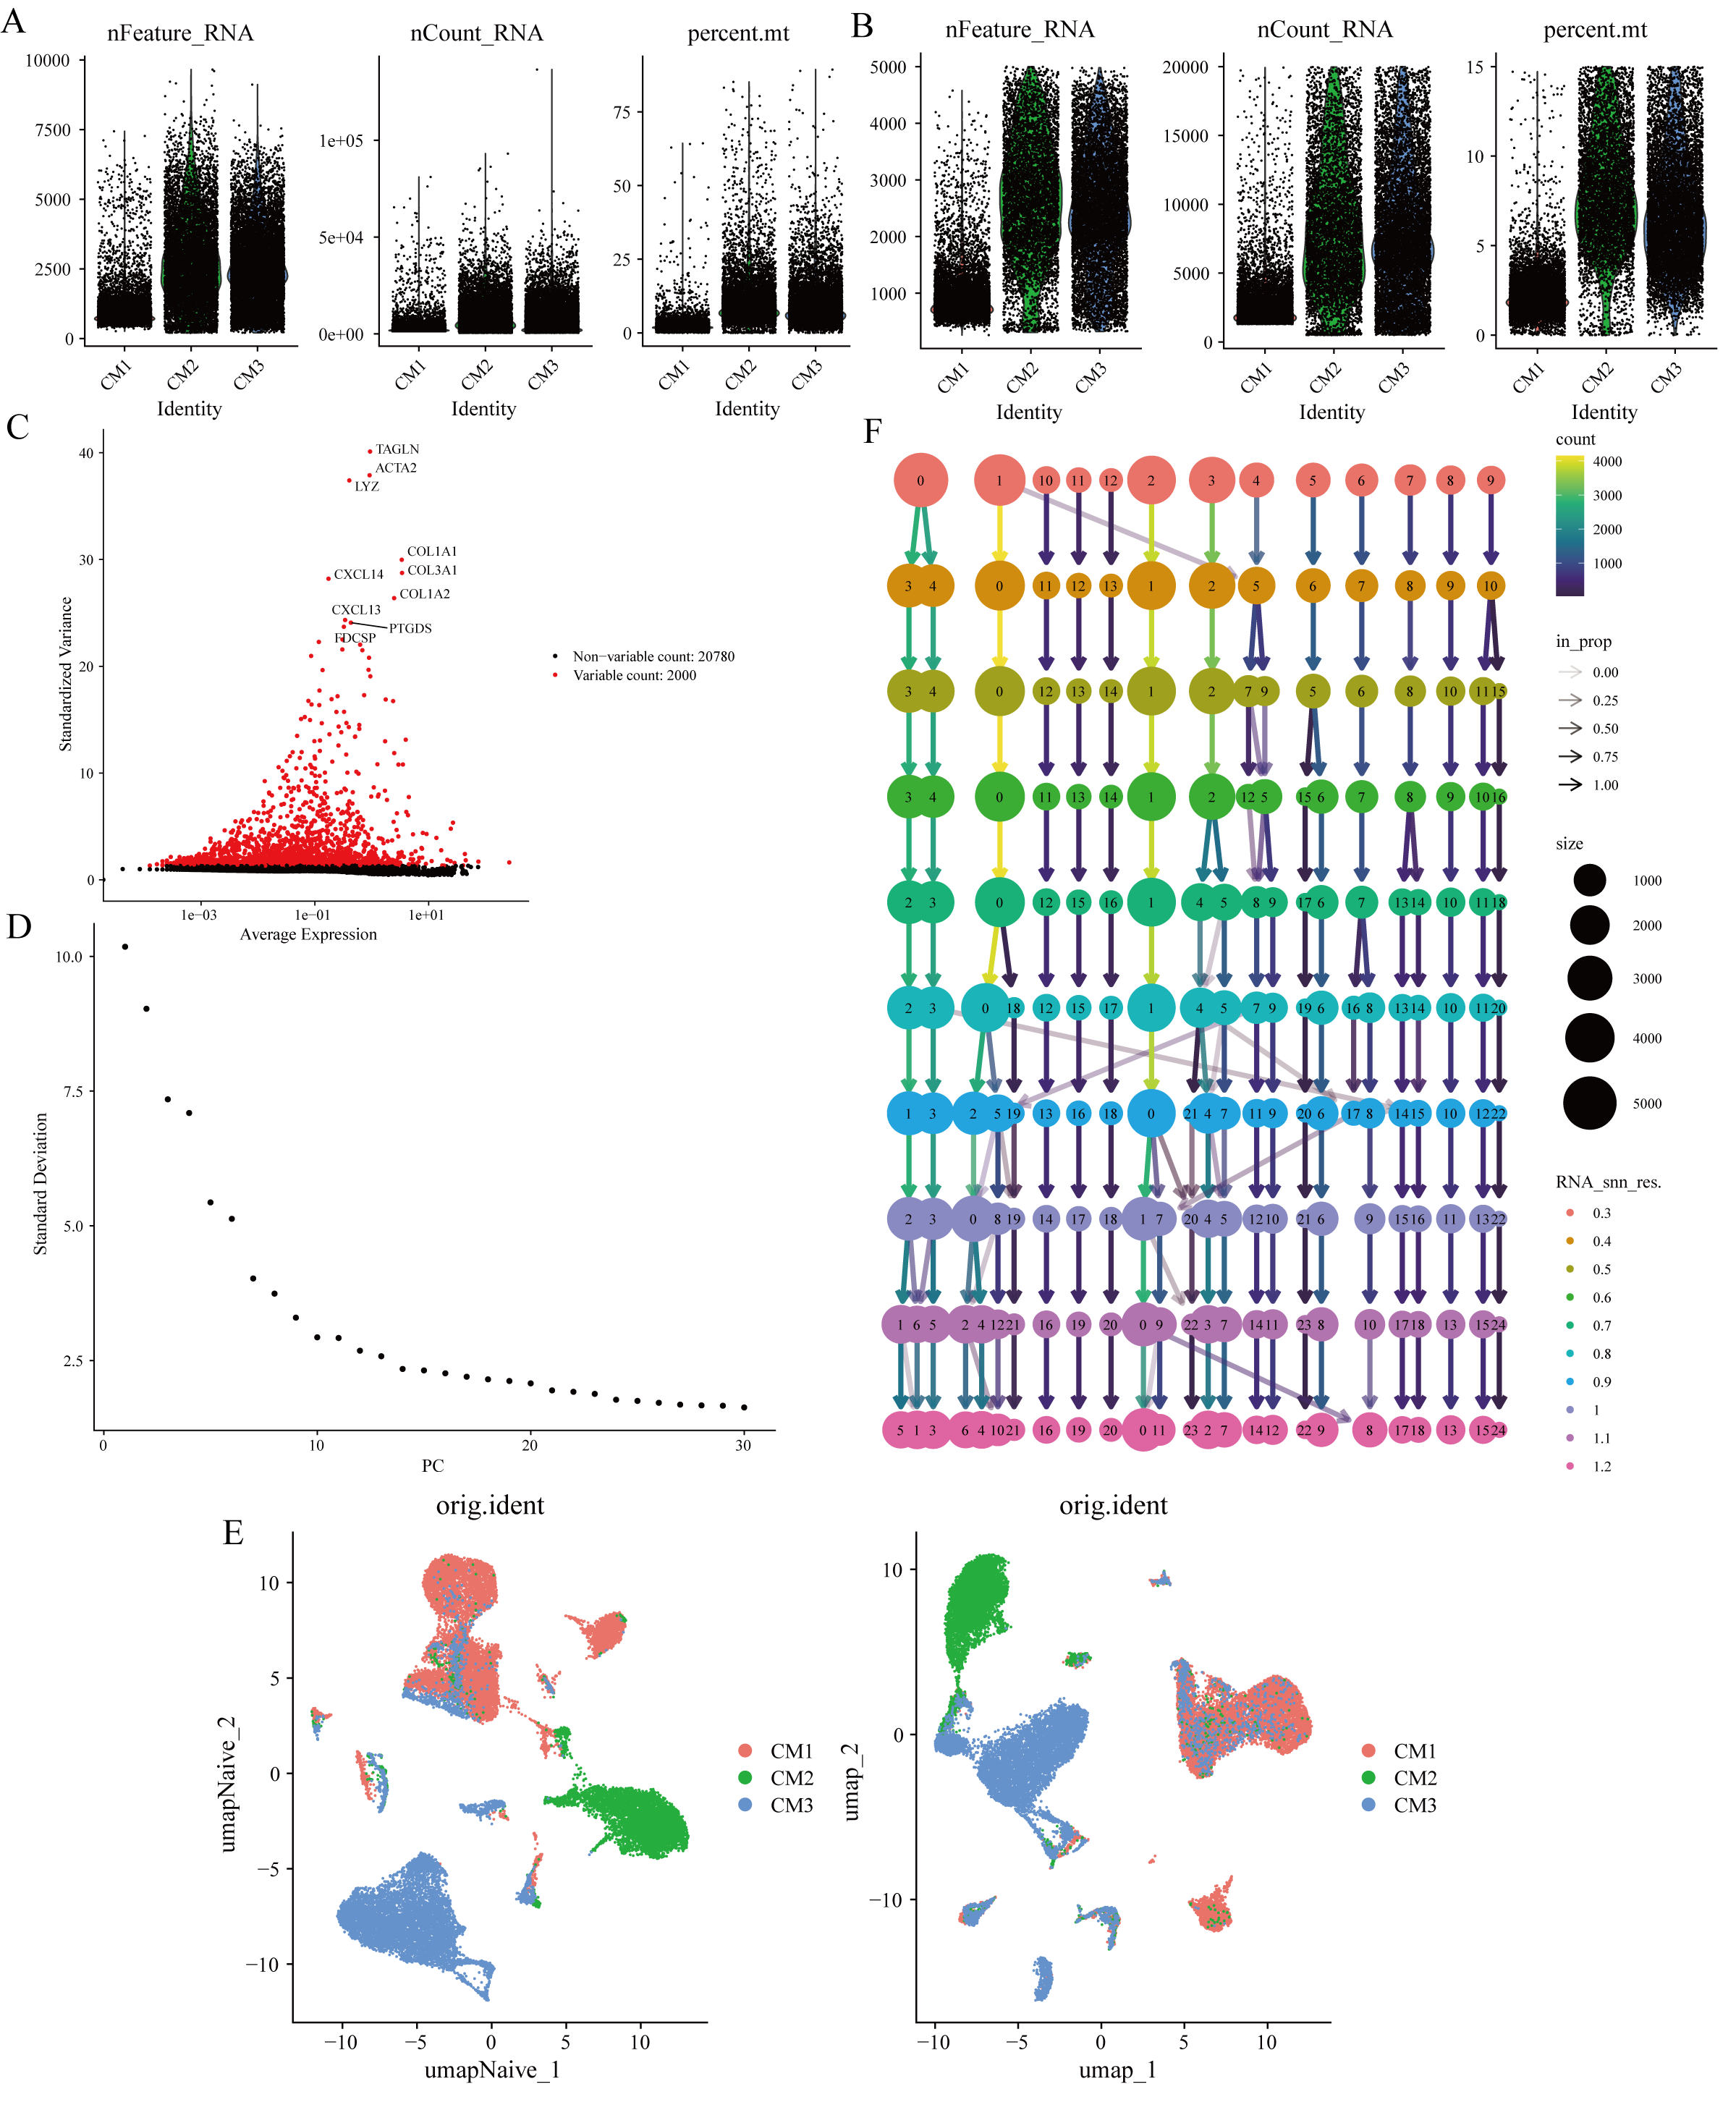


**Supplementary Figure S4** GSE215120 dataset data processing. (A, B) VlnPlot before (left) and after (right) quality control. (C) Scatter plot of the distribution of highly variable genes, labelled top 10 genes. (D) Variance explained plot. (E) UMAP reduction plot before (left) and after (right) removal of batch effect. (F) Distribution relationship of clustering in different resolution cases.
